# Supplementary material
Source: PubMed Central journal article supplement (PMC3857032)
Supplement: NIHMS319971-supplement-1.pdf [file NIHMS319971-supplement-1.pdf]

## **SUPPLEMENTAL MATERIAL**

## **Expanded Methods - Additional Details of PC-HPSA Designation**

Rational areas for the delivery of primary medical care services must meet one of the following criteria: (1) a county or group of contiguous counties whose population centers are within 30 minutes travel time of each other; (2) a portion of a county(s) whose population has limited access to contiguous area resources, >30 minutes travel time, due to topography, market or transportation patterns, distinctive population characteristics or other factors; or (3) established neighborhoods and communities within metropolitan areas which display a strong self-identity (as indicated by a homogeneous socioeconomic or demographic structure and/or a tradition of interaction or intradependency), have a limited interaction with contiguous areas and in general have a minimum population of 20,000. Areas with unusually high needs for primary medical care services are those that meet one of the following criteria: (1) more than 100 births per year per 1,000 women aged 15-44; (2) more than 20 infant deaths per 1,000 live births; or (3) more than 20% of the population (or all households) with incomes below the poverty level. Areas with insufficient capacity of existing primary care providers are those that meet at least two of the following criteria: (1) more than 8,000 office or outpatient visits per year per FTE primary care physician serving the area; (2) unusually long waits for appointments for routine medical services (i.e., more than 7 days for established patients and 14 days for new patients); (3) excessive average waiting time at primary care providers (longer than one hour where patients have appointments or two hours where patients are treated on a first-come, first-served basis); (4) excessive use of emergency room facilities for routine primary care; (5) a substantial proportion (2/3 or more) of the area's physicians do not accept new patients; (6) abnormally low utilization of health services, as indicated by an average of 2.0 or less office visits per year by the area's population.
